# Supplementary material for: The Effect of Intensive Diabetes Treatment on Resting Heart Rate in Type 1 Diabetes
Source: Oxford University Press journal article supplement (doi:10.2337/dc06-1441), 2007-07-28
Supplement: dc061441onlineappendix.doc [file dc061441onlineappendix.doc]

**Table 1. Descriptive statistics of variables measured at DCCT baseline variables, separately for individuals <18 and ≥18 years of age and treatment group(Conventional (Con)/Intensive (Int)) at DCCT baseline.**

| **Variable** | **Group** | **<18 years** | | **≥18 years** | |
| --- | --- | --- | --- | --- | --- |
| Treatment Group |  | Con | Int | Con | Int |
| N | | 103 | 91 | 627 | 617 |
| Cohort | Primary | 70(68.0%) | 55(60.4%) | 308(49.1%) | 293(47.5%) |
| Gender | Male | 46(44.7%) | 49(53.8%) | 349(55.7%) | 316(51.2%) |
| Number of clinics |  | 26 | 24 | 29 | 29 |
| Ethnicity | White | 96(93.2%) | 88(96.7%) | 608(97.0%) | 596(96.6%) |
| Smoker | Yes | 2(1.9%) | 4(4.4%) | 132(21.1%) | 128(20.7%) |
| Clinical neuropathy | Yes | 4(3.9%) | 1(1.1%) | 37(5.9%) | 49(8.0%) |
| Age (years) |  | 14.7± 1.4 | 15.0±1.3 | 28.5± 5.6 | 28.9± 5.7 |
| Duration of Type 1 diabetes (years) | | 4.7 ±3.3 | 4.9±3.3 | 5.6± 4.2 | 5.9±4.3 |
| Dietary caffeine (mg/day) | | 96.2±140.0 | 89.6±125.3 | 417.0±510.8 | 377.7±391.7 |
| Alcohol | Yes | 0(0%) | 0(0%) | 162(25.8%) | 148(24.0%) |

Legend to Table 1. Values are n (%) or mean ± SD. Three individuals with Minnesota ECG codes that resulted in exclusion of their data (see Methods) are not included.

**Table 1. Descriptive statistics of variables measured at DCCT baseline variables, separately for individuals <18 and ≥18 years of age and treatment group (Conventional (Con)/Intensive (Int)) at DCCT baseline. (Continued)**

| **Variable** | **Group** | **<18 years** | | **≥18 years** | |
| --- | --- | --- | --- | --- | --- |
| Treatment Group |  | Con | Int | Con | Int |
| Exercise | Mild | 7(6.8%) | 2(2.2%) | 131(20.9%) | 123(19.9%) |
|  | Moderate | 53(51.5%) | 44(48.4%) | 354(56.5%) | 365(59.2%) |
|  | Hard | 19(18.4%) | 20(22.0%) | 67(10.7%) | 53(8.6%) |
|  | Strenuous | 24(23.3%) | 25(27.5%) | 75(12.0%) | 76(12.3%) |
| Triglycerides(mg/dl) | | 77.4±32.3 | 94.6±68.3 | 82.5± 53.8 | 78.7± 37.7 |
| HDL-cholesterol(mg/dl)* | | 49.5±11.7 | 44.9±9.7 | 50.5± 12.4 | 51.6± 12.5 |
| Eligibility HbA1c (%) | | 9.5±1.8 | 9.5±1.8 | 9.0± 1.6 | 9.0± 1.5 |
| Stimulated C-peptide (pmol/ml)† | | 0.121±0.119 | 0.112±0.119 | 0.091± 0.113 | 0.087± 0.103 |
| RR variation (mean resultant x 1,000) | | 54.3±25.9 | 49.6±24.1 | 46.2± 20.6 | 47.9± 22.2 |
| Valsalva ratio | | 2.0±0.4 | 2.0±0.4 | 2.0± 0.4 | 2.1± 0.4 |
| Systolic Blood pressure (mm Hg) ‡ | | 109.7±11.3 | 110.3±10.0 | 115.6± 11.5 | 113.9± 11.7 |
| BMI (kg/m2) | | 21.4±2.7 | 22.1±2.6 | 23.8± 2.8 | 23.5± 2.7 |

Legend to Table 1. Values are n (%) or mean ± SD. Three individuals with Minnesota ECG codes that resulted in exclusion of their data (see Methods) are not included. The only significant differences between treatment groups were: *for <18 years old p=0.0110; †for>18 years old p=0.0299;and ‡for >18 years old p=0.0048.

Table 2. Resting heart rates according to categorical variables. Results are unadjusted for covariates, and provided separately by study periods (DCCT baseline, during the DCCT, and during EDIC), age group and treatment group (Conventional (Con)/Intensive (Int)) during DCCT/EDIC.

| **Variable** | **Group** | **DCCT baseline** | | | | **DCCT Treatment** | | | | **EDIC** | |
| --- | --- | --- | --- | --- | --- | --- | --- | --- | --- | --- | --- |
| **Age group (years)** |  | **<18** | | **≥18** | | **<18** | | **≥18** | | **All** | |
| Treatment Group |  | Con | Int | Con | Int | Con | Int | Con | Int | Con | Int |
| Subjects |  | 103 | 91 | 627 | 617 | 103 | 92 | 627 | 619 | 701 | 697 |
| RHR measurements |  | 103 | 91 | 627 | 617 | 368 | 342 | 1988 | 1980 | 6411 | 6433 |
| Resting heart rate (rate/min) | All | 69±11 | 70±11 | 68±11 | 68±11 | 73±14 | 70±11 | 69±11 | 68±11 | 71±11 | 69±12 |
| Cohort | Primary | 67±12 | 69±12 | 66±10 | 66±11 | 71±14 | 68±11 | 68±11 | 66±11 | 70±12 | 68±12 |
|  | Secondary | 71±9 | 72±10 | 69±11 | 70±11 | 75±13 | 72±10 | 71±11 | 69±11 | 72±11 | 69±11 |
| Sex | Male | 65±11 | 69±10 | 65±11 | 65±11 | 77±14 | 68±10 | 67±11 | 70±11 | 69±11 | 67±11 |
|  | Female | 71±11 | 72±12 | 71±10 | 71±11 | 67±12 | 73±11 | 72±11 | 65±11 | 73±11 | 71±12 |
| Ethnicity | White | 68±11 | 70±11 | 68±11 | 68±11 | 72±14 | 70±11 | 69±11 | 68±11 | 71±11 | 69±12 |
|  | Non-white | 76±10 | 73±0.6 | 68±10 | 68±12 | 82±10 | 72±9 | 71±11 | 67±11 | 77±13 | 68±11 |
| Smoker | No | 68±11 | 70±11 | 67±11 | 68±12 | 73±14 | 70±11 | 69±11 | 67±11 | 71±12 | 68±12 |
|  | Yes | 74±23 | 69±13 | 70±11 | 70±11 | 68±8 | 71±8 | 71±11 | 69±11 | 73±10 | 71±12 |

Table 2. Resting heart rates according to categorical variables. Results are unadjusted for covariates, and provided separately by study periods (DCCT baseline, during the DCCT, and during EDIC), age group and treatment group (Conventional (Con)/Intensive (Int)) during DCCT/EDIC. (Continued)

| **Variable** | **Group** | DCCT baseline | | | | **DCCT Treatment** | | | | EDIC | |
| --- | --- | --- | --- | --- | --- | --- | --- | --- | --- | --- | --- |
| **Age group (years)** |  | **<18** | | **≥18** | | **<18** | | **≥18** | | All | |
|  |  | Con | Int | Con | Int | Con | Int | Con | Int | Con | Int |
| Clinical neuropathy* | No | 69±12 | 70±11 | 68±11 | 68±11 | 73±14 | 70±11 | 69±11 | 68±11 | 71±12 | 69±12 |
|  | Yes | 64±7 | 73* | 70±10 | 70±13 | 63±12 | 64±7 | 73±11 | 69±12 | 72±11 | 71±13 |
| Alcohol | No | 69±11 | 70±11 | 69±11 | 69±11 | 73±14 | 70±11 | 70±11 | 68±11 | 71±12 | 69±12 |
|  | Yes | - | - | 66±10 | 66±12 | - | - | 67±10 | 66±11 | 70±11 | 67±11 |
| Exercise | Mild | 72±10 | 70±22 | 67±10 | 68±12 | 78±10 | 73±10 | 69±10 | 67±12 | 71±11 | 68±12 |
|  | Moderate | 70±12 | 72±11 | 69±11 | 69±11 | 75±15 | 72±12 | 71±11 | 68±11 | 72±12 | 70±11 |
|  | Hard | 68±12 | 71±10 | 65±12 | 66±12 | 72±12 | 69±9 | 67±12 | 65±11 | 70±12 | 68±12 |
|  | Strenuous | 64±9 | 66±10 | 65±10 | 66±12 | 67±12 | 68±11 | 65±11 | 67±12 | 68±11 | 68±12 |

Legend to Table 2. Values are unadjusted means ± SD. Individuals with Minnesota ECG codes that resulted in exclusion of their data (see Methods) are not included: this resulted in the deletion of 3 individuals from DCCT baseline, 7 values from the DCCT treatment analysis, and 7 values from the EDIC analysis. Variables measured at DCCT baseline. *=There is only one person in the intensive group less than 18 that had clinical neuropathy at DCCT baseline. - = data not available (zero observations).

**Table 3. Resting heart rates unadjusted for covariates according to medication usage during EDIC by treatment group**

**(Conventional (Con)/Intensive (Int)).**

| Medication |  | **N (Con)** | **Con** | N (Int) | Int |
| --- | --- | --- | --- | --- | --- |
| ACE inhibitor | No | 5093 | 70±11 | 5415 | 68±11 |
|  | Yes | 1318 | 74±11 | 1018 | 72±13 |
| Beta-blocker | No | 6267 | 71±12 | 6369 | 69±12 |
|  | Yes | 144 | 72±11 | 64 | 72±14 |
| Calcium channel blocker | No | 6210 | 71±11 | 6250 | 69±12 |
|  | Yes | 201 | 75±11 | 183 | 72±13 |

Legend to Table 3. ACE inhibitors, beta-blockers, and calcium channel blockers were recorded only during EDIC. Values are the number of RHR measurements and the corresponding unadjusted means ± SD.

**Table 4. Resting heart rates unadjusted for covariates provided separately by time periods, age group and treatment group**

**(Conventional (Con)/Intensive (Int)) during DCCT.**

| **Age group (years)** |  | **<18** | | | | **≥18** | | | |
| --- | --- | --- | --- | --- | --- | --- | --- | --- | --- |
| Treatment Group |  | N(Con) | Con | N(Int) | Int | N(Con) | Con | N(Int) | Int |
| DCCT year | 2 | 99 | 70±14 | 88 | 68±10 | 605 | 68±11 | 595 | 67±11 |
|  | 4 | 78 | 72±12 | 67 | 71±12 | 497 | 69±11 | 487 | 67±11 |
|  | 6 | 50 | 75±16 | 54 | 72±10 | 175 | 70±10 | 189 | 69±11 |
|  | 8 | 38 | 76±14 | 41 | 72±10 | 86 | 73±11 | 92 | 68±12 |
|  | Closeout | 103 | 74±14 | 92 | 70±12 | 625 | 70±11 | 617 | 69±11 |

Legend 4. Values are the number of RHR measurements and the corresponding unadjusted means ± SD.

**Table 5. Resting heart rates unadjusted for covariates provided separately by time periods and treatment group (Conventional (Con)/Intensive (Int)) during EDIC.**

| **Treatment Group** |  | **N(Con)** | **Con** | **N(Int)** | **Int** |
| --- | --- | --- | --- | --- | --- |
| EDIC year | 1 | 660 | 70±12 | 661 | 67±11 |
|  | 2 | 651 | 70±12 | 658 | 67±11 |
|  | 3 | 636 | 71±11 | 647 | 68±11 |
|  | 4 | 642 | 72±11 | 643 | 69±12 |
|  | 5 | 641 | 71±11 | 640 | 69±12 |
|  | 6 | 652 | 72±11 | 641 | 70±12 |
|  | 7 | 642 | 72±12 | 647 | 71±12 |
|  | 8 | 630 | 72±12 | 635 | 70±12 |
|  | 9 | 624 | 71±11 | 629 | 69±11 |
|  | 10 | 633 | 71±11 | 632 | 70±12 |

Legend 5. Values are the number of RHR measurements and the corresponding unadjusted means ± SD.
